# Supplementary material
Source: PubMed Central journal article supplement (PMC3527240)
Supplement: 0c51a76bc0fd941def28fdf7860c97aa_genetics.112.146993-8.pdf [file 0c51a76bc0fd941def28fdf7860c97aa_genetics.112.146993-8.pdf]

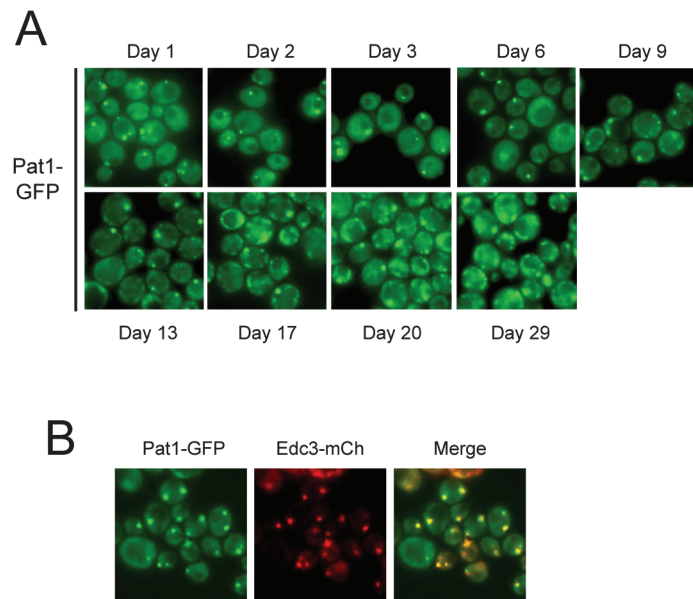

**Figure S5** P body foci were present in stationary phase cells. (A) The localization of a Pat1-GFP reporter was assessed by fluorescence microscopy after the indicated days of growth. (C) The localization patterns of the Pat1-GFP and Edc3-mCh reporters is shown for cells after one day of growth in SC glucose medium.
