# Supplementary material
Source: PubMed Central journal article supplement (PMC3527240)
Supplement: 5f043bd996c49ce015d5f3a3ba77bf4e_genetics.112.146993-2.pdf [file 5f043bd996c49ce015d5f3a3ba77bf4e_genetics.112.146993-2.pdf]

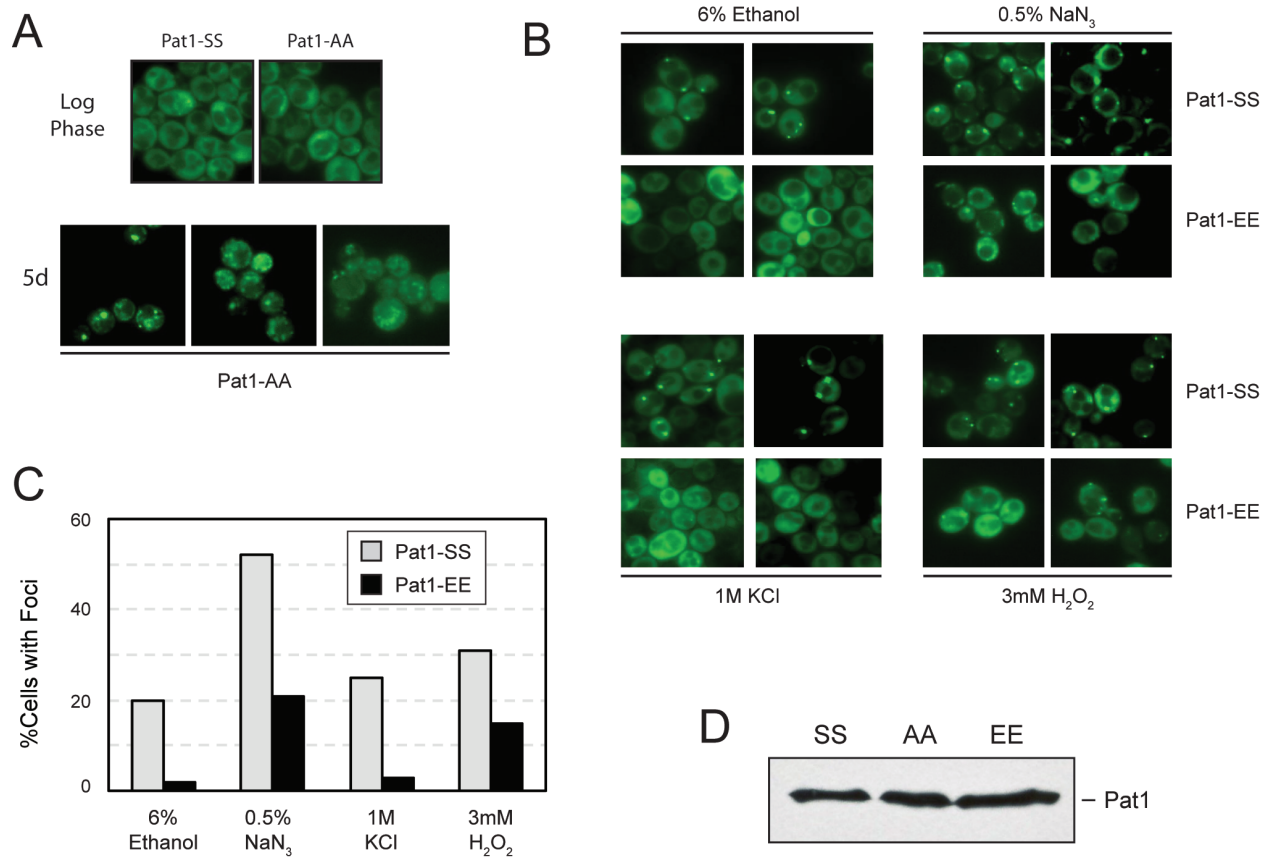

**Figure S4** P body foci formation was diminished in cells expressing the phosphomimetic Pat1-EE variant. (A) P body foci formation in cells expressing the nonphosphorylatable Pat1-AA. Cells expressing the wild-type, Pat1-SS, or the Pat1-AA variant were examined by fluorescence microscopy during either log phase growth or after 5 days of incubation. (B) The presence of Pat1-EE resulted in fewer P body foci in response to all stress conditions tested. Cells expressing either Pat1-SS or Pat1-EE were examined by fluorescence microscopy after at 10 min exposure to the indicated stress conditions. (C) A graph showing the quantitation of the microscopy data presented in panel B. (D) Levels of the indicated Pat1 variants in log phase cells were determined by Western blotting with an  $\alpha$ -GFP antibody.
