# Supplementary material
Source: PubMed Central journal article supplement (PMC3527240)
Supplement: 8d098b8902b557814d0e36fd4e7d17d3_genetics.112.146993-9.pdf [file 8d098b8902b557814d0e36fd4e7d17d3_genetics.112.146993-9.pdf]

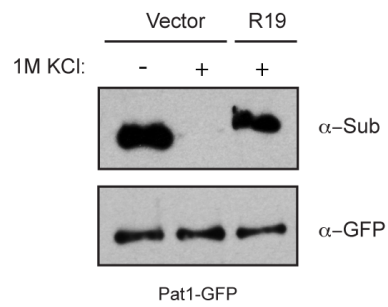

**Figure S1** The presence of the *RAS2<sup>val19</sup>* allele resulted in elevated levels of PKA phosphorylated Pat1. The level of PKA phosphorylation on Pat1 was assessed by Western blotting with the anti-phosphosubstrate antibody ( $\alpha$ -Sub). The protein extracts were prepared from cells either before (-) or after a 10 min exposure to a 1M KCl salt stress (+). The cells contained either a control vector or a *RAS2<sup>val19</sup>* plasmid as indicated. The bottom panel is a loading control that shows the total amount of the Pat1-GFP protein present in the cell extracts.
