# Supplementary material
Source: PubMed Central journal article supplement (PMC3527240)
Supplement: 29ce4ae773dc5dd56b94300d2885ea27_genetics.112.146993-4.pdf [file 29ce4ae773dc5dd56b94300d2885ea27_genetics.112.146993-4.pdf]

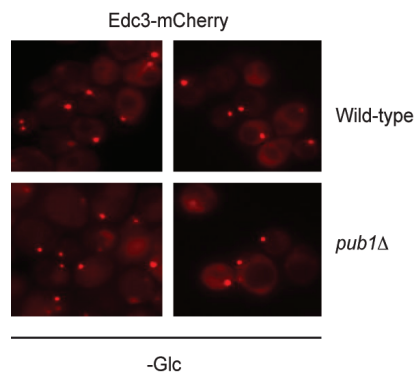

**Figure S7** Similar numbers of P body foci were detected in wild-type and *pub1*Δ cells that had been exposed to a 15 min glucose starvation. Two representative images are shown for each strain background.
