# Supplementary material
Source: PubMed Central journal article supplement (PMC3527240)
Supplement: 137f82a629000d1f38f9816bd1f4daf4_genetics.112.146993-3.pdf [file 137f82a629000d1f38f9816bd1f4daf4_genetics.112.146993-3.pdf]

**Table S2 Plasmids used in this study**

| Plasmid   | Description                                                                   | Reference                         |
|-----------|-------------------------------------------------------------------------------|-----------------------------------|
| pPHY795   | <i>MET3<sub>pro</sub>-RAS2<sup>Val19</sup></i> in pRS415 ( <i>CEN, LEU2</i> ) | (Ramachandran <i>et al.</i> 2011) |
| pPHY796   | <i>MET3<sub>pro</sub>-RAS2<sup>Val19</sup></i> in pRS416 ( <i>CEN, URA3</i> ) | (Ramachandran <i>et al.</i> 2011) |
| pPHY921   | <i>RAS2<sup>Val19</sup></i> in pRS316                                         | (Ramachandran <i>et al.</i> 2011) |
| pPHY2203  | <i>CUP1<sub>pro</sub>-TPK1-HA<sub>3</sub></i> ( <i>URA3</i> )                 | (Deminoff <i>et al.</i> 2006)     |
| pPHY2659  | DHH1-GFP ( <i>CEN, URA3</i> )                                                 | Dr. Tien-Hsien Chang              |
| pDHH1018  |                                                                               |                                   |
| pPHY2915  | <i>CUP1<sub>pro</sub>-TPK2-HA<sub>3</sub></i> ( <i>URA3</i> )                 | (Deminoff <i>et al.</i> 2006)     |
| pPHY2916  | <i>CUP1<sub>pro</sub>-TPK3-HA<sub>3</sub></i> ( <i>URA3</i> )                 | (Deminoff <i>et al.</i> 2006)     |
| pPHY3360  | <i>PAT1<sub>pro</sub>-Myc-PAT1-AA</i> ( <i>CEN, HIS3</i> )                    | (Ramachandran <i>et al.</i> 2011) |
| pPHY3362  | <i>PAT1<sub>pro</sub>-Myc-PAT1-SS</i> ( <i>CEN, HIS3</i> )                    | (Ramachandran <i>et al.</i> 2011) |
| pPHY3506  | <i>PAT1<sub>pro</sub>-GFP-PAT1-SS</i> ( <i>CEN, HIS3</i> )                    | (Ramachandran <i>et al.</i> 2011) |
| pPHY3507  | <i>PAT1<sub>pro</sub>-GFP-PAT1-AA</i> ( <i>CEN, HIS3</i> )                    | (Ramachandran <i>et al.</i> 2011) |
| pPHY3509  | <i>PAT1<sub>pro</sub>-GFP-PAT1-EE</i> ( <i>CEN, HIS3</i> )                    | (Ramachandran <i>et al.</i> 2011) |
| pPHY3660  | <i>EDC3-mCherry</i> ( <i>CEN, URA3</i> )                                      | (Buchan <i>et al.</i> 2011)       |
| (pRP1574) |                                                                               |                                   |
| pPHY3661  | <i>PAB1-GFP</i> ( <i>URA3</i> )                                               | (Buchan <i>et al.</i> 2008)       |
| (pRP1362) |                                                                               |                                   |
| pPHY3665  | <i>PAB1-GFP, EDC3-mCherry</i> ( <i>CEN, URA3</i> )                            | (Buchan <i>et al.</i> 2011)       |
| (pRP1657) |                                                                               |                                   |
| pPHY3667  | <i>PAB1-GFP, DCP2-mCherry</i> ( <i>CEN, TRP1</i> )                            | (Buchan <i>et al.</i> 2011)       |
| (pRP1660) |                                                                               |                                   |
| pPHY3671  | <i>EDC3-mCherry; PBP1-GFP</i> ( <i>CEN, TRP1</i> )                            | (Swisher and Parker 2010)         |
| (pRP1944) |                                                                               |                                   |
| pPHY3685  | <i>PAT1<sub>pro</sub>-GFP-Pat1-SS</i> ( <i>HIS3</i> )                         | This study                        |
| pPHY3691  | <i>PAT1<sub>pro</sub>-GFP-Pat1-AA</i> ( <i>HIS3</i> )                         | This study                        |
| pPHY3693  | <i>PAT1<sub>pro</sub>-GFP-Pat1-EE</i> ( <i>HIS3</i> )                         | This study                        |
| pPHY3702  | <i>ADH2<sub>pro</sub>-H2B-mCherry</i> ( <i>CEN, LEU2</i> )                    | Dr. James Hopper                  |
| pOE79     |                                                                               |                                   |

## Literature Cited

- Buchan, J. R., D. Muhlrud and R. Parker, 2008 P bodies promote stress granule assembly in *Saccharomyces cerevisiae*. *J Cell Biol* 183: 441-455.
- Buchan, J. R., J. H. Yoon and R. Parker, 2011 Stress-specific composition, assembly and kinetics of stress granules in *Saccharomyces cerevisiae*. *J Cell Sci* 124: 228-239.
- Coller, J., and R. Parker, 2005 General translational repression by activators of mRNA decapping. *Cell* 122: 875-886.
- Decker, C. J., D. Teixeira and R. Parker, 2007 Edc3p and a glutamine/asparagine-rich domain of Lsm4p function in processing body assembly in *Saccharomyces cerevisiae*. *J Cell Biol* 179: 437-449.
- Deminoff, S. J., S. C. Howard, A. Hester, S. Warner and P. K. Herman, 2006 Using substrate-binding variants of the cAMP-dependent protein kinase to identify novel targets and a kinase domain important for substrate interactions in *Saccharomyces cerevisiae*. *Genetics* 173: 1909-1917.
- Mazon, M. J., M. M. Behrens, E. Morgado and F. Portillo, 1993 Low activity of the yeast cAMP-dependent protein kinase catalytic subunit Tpk3 is due to the poor expression of the TPK3 gene. *European journal of biochemistry / FEBS* 213: 501-506.
- Pan, X., and J. Heitman, 2002 Protein kinase A operates a molecular switch that governs yeast pseudohyphal differentiation. *Mol Cell Biol* 22: 3981-3993.
- Ramachandran, V., K. H. Shah and P. K. Herman, 2011 The cAMP-dependent protein kinase signaling pathway is a key regulator of P body foci formation. *Mol Cell* 43: 973-981.
- Swisher, K. D., and R. Parker, 2010 Localization to, and effects of Pbp1, Pbp4, Lsm12, Dhh1, and Pab1 on stress granules in *Saccharomyces cerevisiae*. *PLoS One* 5: e10006.
- Teixeira, D., and R. Parker, 2007 Analysis of P-body assembly in *Saccharomyces cerevisiae*. *Mol Biol Cell* 18: 2274-2287.
- Valay, J. G., M. Simon and G. Faye, 1993 The kin28 protein kinase is associated with a cyclin in *Saccharomyces cerevisiae*. *Journal of molecular biology* 234: 307-310.
