# Supplementary material
Source: PubMed Central journal article supplement (PMC3527240)
Supplement: 287e9e5b4c33776046c07507e26cdb68_genetics.112.146993-1.pdf [file 287e9e5b4c33776046c07507e26cdb68_genetics.112.146993-1.pdf]

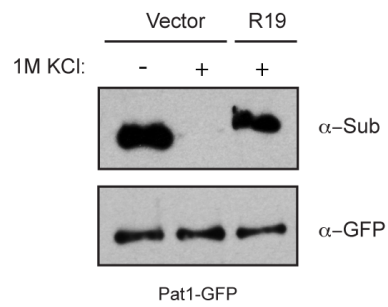

**Figure S1** The presence of the *RAS2<sup>val19</sup>* allele resulted in elevated levels of PKA phosphorylated Pat1. The level of PKA phosphorylation on Pat1 was assessed by Western blotting with the anti-phosphosubstrate antibody ( $\alpha$ -Sub). The protein extracts were prepared from cells either before (-) or after a 10 min exposure to a 1M KCl salt stress (+). The cells contained either a control vector or a *RAS2<sup>val19</sup>* plasmid as indicated. The bottom panel is a loading control that shows the total amount of the Pat1-GFP protein present in the cell extracts.

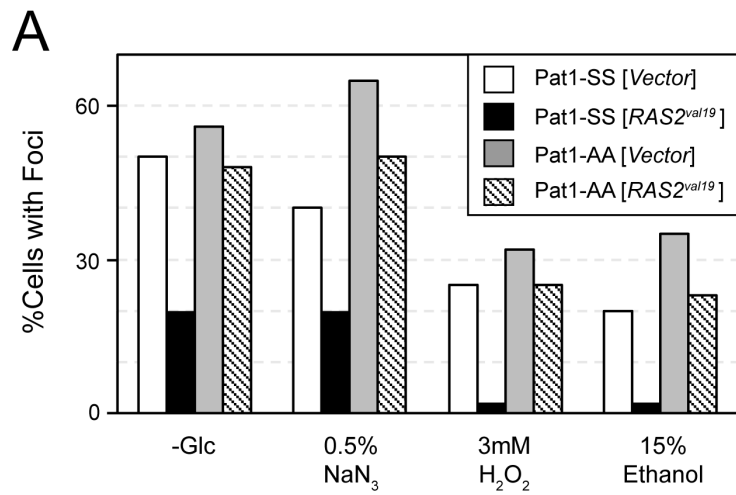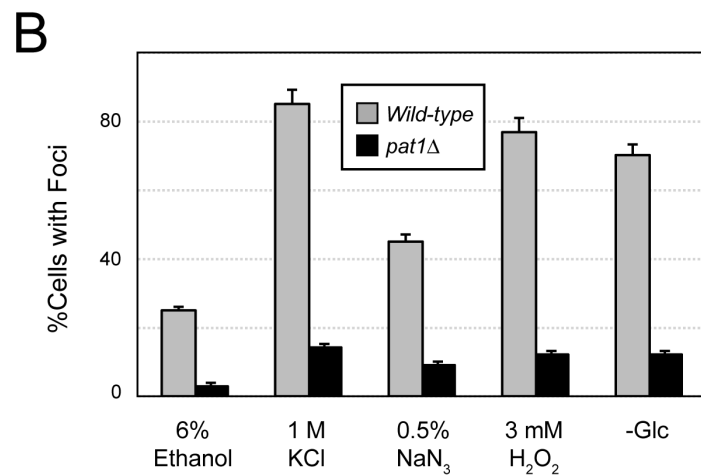

**Figure S2** Quantifying the effects of *RAS2<sup>val19</sup>* and the loss of Pat1 on P body foci formation in response to different stimuli. (A) Quantitation of the microscopy data shown in Figure 4C. The presence of the Pat1-AA variant suppresses the inhibitory effect that *RAS2<sup>val19</sup>* has on P body foci formation. P body foci were indicated by GFP-tagged versions of either Pat1-SS or Pat1-AA, as indicated. (B) Quantitation of the microscopy data shown in Figure 4D. The fraction of cells containing an Edc3-mCh focus was assessed in wild-type and *pat1Δ* cells after a 10 min exposure to the indicated stress condition.

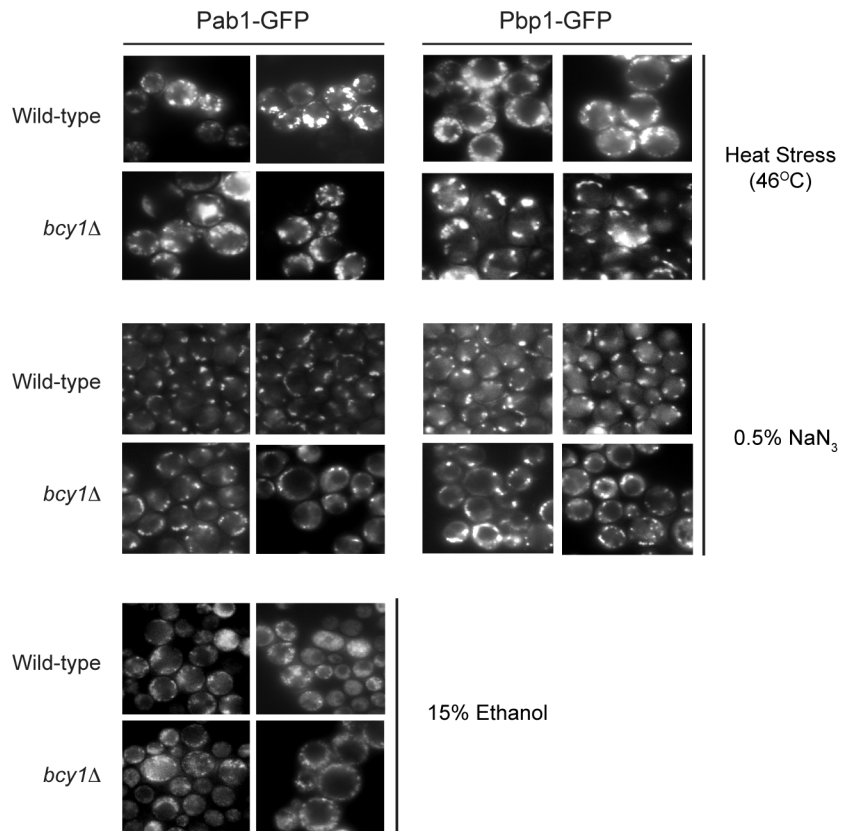

**Figure S3** Stress granule foci form in normal numbers in *bcy1Δ* mutant cells. Wild-type or *bcy1Δ* cells expressing either a Pab1- or Pbp1-GFP reporter were examined by fluorescence microscopy after a 30 min exposure to the indicated stress condition.

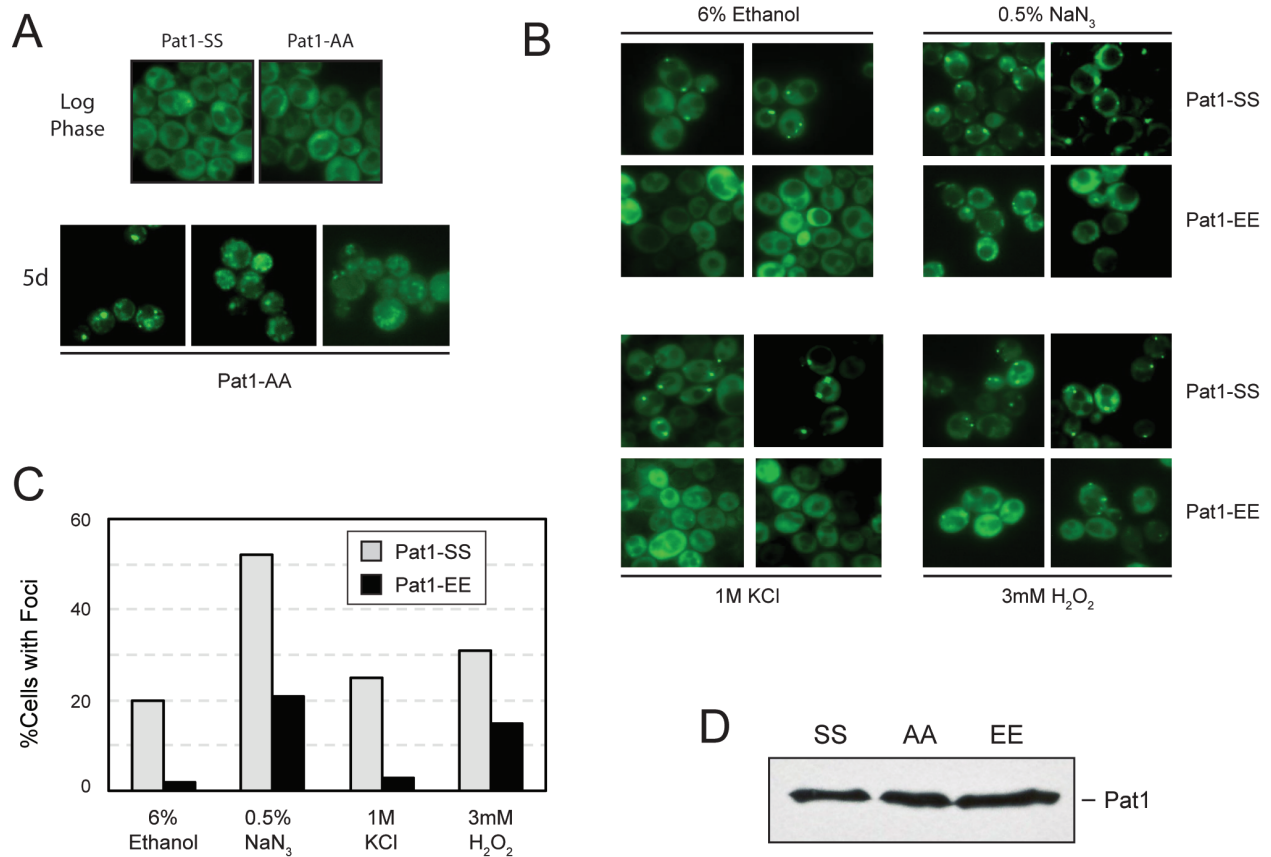

**Figure S4** P body foci formation was diminished in cells expressing the phosphomimetic Pat1-EE variant. (A) P body foci formation in cells expressing the nonphosphorylatable Pat1-AA. Cells expressing the wild-type, Pat1-SS, or the Pat1-AA variant were examined by fluorescence microscopy during either log phase growth or after 5 days of incubation. (B) The presence of Pat1-EE resulted in fewer P body foci in response to all stress conditions tested. Cells expressing either Pat1-SS or Pat1-EE were examined by fluorescence microscopy after at 10 min exposure to the indicated stress conditions. (C) A graph showing the quantitation of the microscopy data presented in panel B. (D) Levels of the indicated Pat1 variants in log phase cells were determined by Western blotting with an  $\alpha$ -GFP antibody.

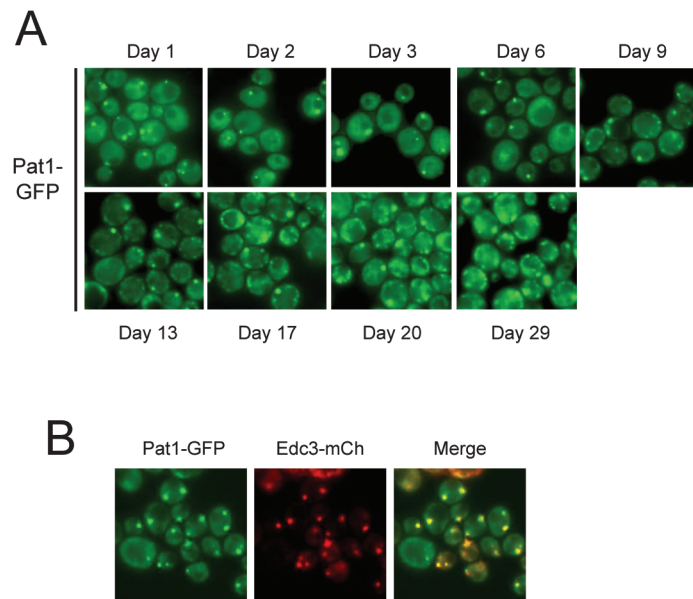

**Figure S5** P body foci were present in stationary phase cells. (A) The localization of a Pat1-GFP reporter was assessed by fluorescence microscopy after the indicated days of growth. (C) The localization patterns of the Pat1-GFP and Edc3-mCh reporters is shown for cells after one day of growth in SC glucose medium.

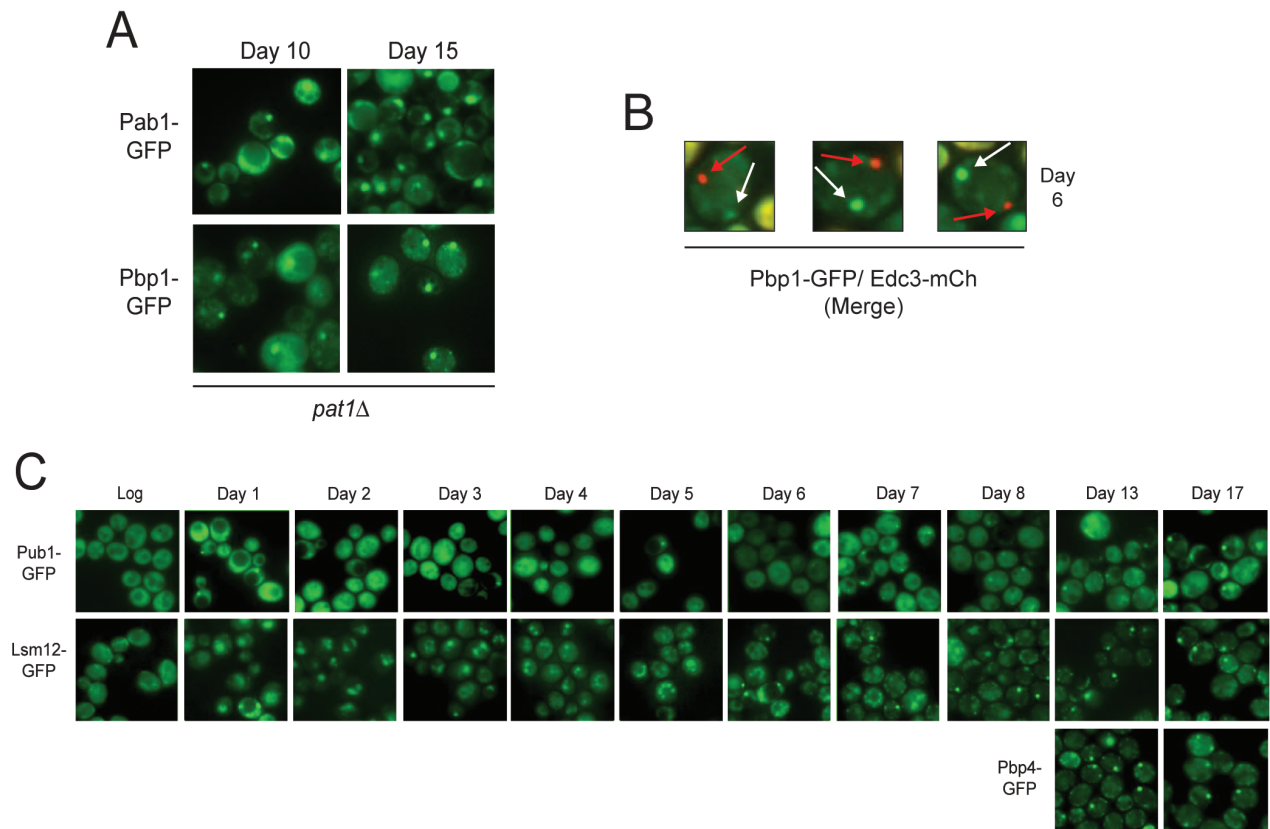

**Figure S6** Stress granule foci were present in stationary phase cells. (A) The number of stress granule foci was not reduced in *pat1Δ* cells. The localization of the Pab1- and Pbp1-GFP reporters in wild-type and *pat1Δ* cells was assessed by fluorescence microscopy at the indicated times of growth. (B) P body and stress granule reporters did not co-localize in cells after 6 days of growth in an SC-glucose medium. Representative images of three cells containing both Pbp1-GFP (indicated by the white arrows) and Edc3-mCh (red arrows) foci are shown. Quantitation of the data are indicated in the text. (C) The localization of the indicated GFP-tagged stress granule reporters was assessed by fluorescence microscopy at the indicated days of growth.

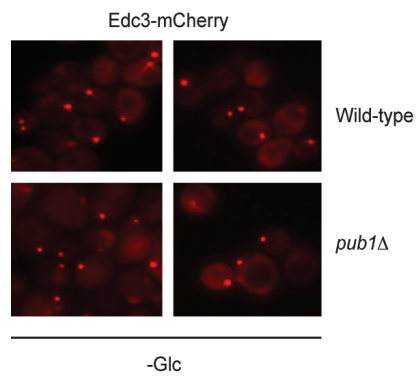

**Figure S7** Similar numbers of P body foci were detected in wild-type and *pub1*Δ cells that had been exposed to a 15 min glucose starvation. Two representative images are shown for each strain background.

**Table S1 Yeast strains used in this study**

|                        |                                                                                                                        |                             |
|------------------------|------------------------------------------------------------------------------------------------------------------------|-----------------------------|
| PHY1736<br>(GF260-2)   | <i>MATa leu2 trp1 ura3 lys2</i>                                                                                        | (Valay <i>et al.</i> 1993)) |
| PHY 1954               | <i>MATa leu2 trp1 ura3 lys2 ras2::URA3</i>                                                                             | This study                  |
| PHY3193<br>(XPY310a)   | <i>MATa/α pep4::HIS3/pep4::HIS3 prb1_1.6R/prb1_1.6R can1/can1 ura3-52/ura3-52 his3_200/his3_200 GAL1-GST-TPK1/TPK1</i> | (Pan and Heitman 2002)      |
| PHY3194<br>(XPY311a)   | <i>MATa/α pep4::HIS3/pep4::HIS3 prb1_1.6R/prb1_1.6R can1/can1 ura3-52/ura3-52 his3_200/his3_200 GAL1-GST-TPK2/TPK2</i> | (Pan and Heitman 2002))     |
| PHY3362<br>(W303-1A)   | <i>MATa ade2-1 can1-100 ura3-1 leu2-3,112 his3-11,15 trp1-1 TPK1 TPK2 TPK3</i>                                         | (Mazon <i>et al.</i> 1993)  |
| PHY3364<br>(MB23)      | <i>PHY3362 TPK1 tpk2: :HIS3 tpk3: :URA3</i>                                                                            | (Mazon <i>et al.</i> 1993)  |
| PHY3367<br>(MB13)      | <i>PHY3362 tpk1: :LEU2 TPK2 tpk3: :URA3</i>                                                                            | (Mazon <i>et al.</i> 1993)  |
| PHY3369<br>(MB12)      | <i>PHY 3362 tpk1: :LEU2 tpk2: :HIS3 TPK3</i>                                                                           | (Mazon <i>et al.</i> 1993)  |
| PHY4231<br>(BY4741)    | <i>MATa hisΔ1 leu2Δ0 met15Δ0 ura3Δ0</i>                                                                                | Open Biosystems             |
| PHY 4311               | <i>MATα his3 leu2 ura3</i>                                                                                             | (Coller and Parker 2005)    |
| PHY4313<br>(yRP2067)   | <i>MATα his3 leu2 ura3 pat1Δ::NEO</i>                                                                                  | (Coller and Parker 2005)    |
| PHY4697<br>(Y3175)     | <i>MATa ade2-1 can1-100 his3-11,15 leu2-3,112 trp1-1 ura3-1 tpk2::KAN tpk3::TRP1 tpk1(M164G)</i>                       | Dr. James Broach            |
| PHY4773                | <i>MATa his3Δ1 leu2Δ0 met15Δ0 ura3Δ0 DCP2-GFP</i>                                                                      | Invitrogen                  |
| PHY4774                | <i>MATa his3Δ1 leu2Δ0 met15Δ0 ura3Δ0 XRN1-GFP</i>                                                                      | Invitrogen                  |
| PHY4827<br>(yRP2162)   | <i>MATa his4-539 leu2-3,112 trp1 ura3-52 cup1::LEU2/PGK1pG/MFA2pG Dcp2-GFP(NEO)</i>                                    | (Decker <i>et al.</i> 2007) |
| PHY 4833<br>(yRP 2183) | <i>MATa leu2-3,112 trp1 ura3-52 his4-539 lys2-201 cup1::LEU2/PGK1pG/MFA2pG pat1::LEU2 DCP2-GFP (NEO)</i>               | (Teixeira and Parker 2007)  |
| PHY 4834<br>(yRP1724)  | <i>MATa2 his4-539 leu2-3,112 trp1 ura3-5 cup1::LEU2/PGK1pG/MFA2pG DHH1-GFP (NEO)</i>                                   | (Decker <i>et al.</i> 2007) |
| PHY 4898               | <i>MATa leu2 trp1 ura3 lys2 ras2::URA3 pat1::KAN</i>                                                                   | This study                  |



|          |                                                      |                 |
|----------|------------------------------------------------------|-----------------|
| PHY 4899 | <i>MATa his3Δ1 leu2Δ0 met15Δ0 ura3Δ0 PAB1-GFP</i>    | Invitrogen      |
| PHY 4900 | <i>MATa his3Δ1 leu2Δ0 met15Δ0 ura3Δ0 PBP1-GFP</i>    | Invitrogen      |
| PHY 4927 | <i>MATα his3 leu2 ura3 pat1Δ:: NEO GFP-[PAT1-SS]</i> | This study      |
| PHY 4928 | <i>MATα his3 leu2 ura3 pat1Δ:: NEO GFP-[PAT1-AA]</i> | This study      |
| PHY 4929 | <i>MATα his3 leu2 ura3 pat1Δ:: NEO GFP-[PAT1-EE]</i> | This study      |
| PHY 4939 | <i>MATa his3Δ1 leu2Δ0 met15Δ0 ura3Δ0 PBP4-GFP</i>    | Invitrogen      |
| PHY 4940 | <i>MATa his3Δ1 leu2Δ0 met15Δ0 ura3Δ0 PUB1-GFP</i>    | Invitrogen      |
| PHY 4941 | <i>MATa his3Δ1 leu2Δ0 met15Δ0 ura3Δ0 LSM12-GFP</i>   | Invitrogen      |
| PHY 4942 | <i>MATa his3Δ1 leu2Δ0 met15Δ0 ura3Δ0 PAT1-GFP</i>    | Invitrogen      |
| PHY 4859 | <i>MATa hisΔ1 leu2Δ0 met15Δ0 ura3Δ0 pbp4::KAN</i>    | Open Biosystems |
| PHY 4860 | <i>MATa hisΔ1 leu2Δ0 met15Δ0 ura3Δ0 lsm12::KAN</i>   | Open Biosystems |
| PHY 4869 | <i>MATa hisΔ1 leu2Δ0 met15Δ0 ura3Δ0 pub1::KAN</i>    | Open Biosystems |
| PHY 4870 | <i>MATa hisΔ1 leu2Δ0 met15Δ0 ura3Δ0 pbp1::KAN</i>    | Open Biosystems |

---

**Table S2 Plasmids used in this study**

| Plasmid   | Description                                                                   | Reference                         |
|-----------|-------------------------------------------------------------------------------|-----------------------------------|
| pPHY795   | <i>MET3<sub>pro</sub>-RAS2<sup>Val19</sup></i> in pRS415 ( <i>CEN, LEU2</i> ) | (Ramachandran <i>et al.</i> 2011) |
| pPHY796   | <i>MET3<sub>pro</sub>-RAS2<sup>Val19</sup></i> in pRS416 ( <i>CEN, URA3</i> ) | (Ramachandran <i>et al.</i> 2011) |
| pPHY921   | <i>RAS2<sup>Val19</sup></i> in pRS316                                         | (Ramachandran <i>et al.</i> 2011) |
| pPHY2203  | <i>CUP1<sub>pro</sub>-TPK1-HA<sub>3</sub></i> ( <i>URA3</i> )                 | (Deminoff <i>et al.</i> 2006)     |
| pPHY2659  | DHH1-GFP ( <i>CEN, URA3</i> )                                                 | Dr. Tien-Hsien Chang              |
| pDHH1018  |                                                                               |                                   |
| pPHY2915  | <i>CUP1<sub>pro</sub>-TPK2-HA<sub>3</sub></i> ( <i>URA3</i> )                 | (Deminoff <i>et al.</i> 2006)     |
| pPHY2916  | <i>CUP1<sub>pro</sub>-TPK3-HA<sub>3</sub></i> ( <i>URA3</i> )                 | (Deminoff <i>et al.</i> 2006)     |
| pPHY3360  | <i>PAT1<sub>pro</sub>-Myc-PAT1-AA</i> ( <i>CEN, HIS3</i> )                    | (Ramachandran <i>et al.</i> 2011) |
| pPHY3362  | <i>PAT1<sub>pro</sub>-Myc-PAT1-SS</i> ( <i>CEN, HIS3</i> )                    | (Ramachandran <i>et al.</i> 2011) |
| pPHY3506  | <i>PAT1<sub>pro</sub>-GFP-PAT1-SS</i> ( <i>CEN, HIS3</i> )                    | (Ramachandran <i>et al.</i> 2011) |
| pPHY3507  | <i>PAT1<sub>pro</sub>-GFP-PAT1-AA</i> ( <i>CEN, HIS3</i> )                    | (Ramachandran <i>et al.</i> 2011) |
| pPHY3509  | <i>PAT1<sub>pro</sub>-GFP-PAT1-EE</i> ( <i>CEN, HIS3</i> )                    | (Ramachandran <i>et al.</i> 2011) |
| pPHY3660  | <i>EDC3-mCherry</i> ( <i>CEN, URA3</i> )                                      | (Buchan <i>et al.</i> 2011)       |
| (pRP1574) |                                                                               |                                   |
| pPHY3661  | <i>PAB1-GFP</i> ( <i>URA3</i> )                                               | (Buchan <i>et al.</i> 2008)       |
| (pRP1362) |                                                                               |                                   |
| pPHY3665  | <i>PAB1-GFP, EDC3-mCherry</i> ( <i>CEN, URA3</i> )                            | (Buchan <i>et al.</i> 2011)       |
| (pRP1657) |                                                                               |                                   |
| pPHY3667  | <i>PAB1-GFP, DCP2-mCherry</i> ( <i>CEN, TRP1</i> )                            | (Buchan <i>et al.</i> 2011)       |
| (pRP1660) |                                                                               |                                   |
| pPHY3671  | <i>EDC3-mCherry; PBP1-GFP</i> ( <i>CEN, TRP1</i> )                            | (Swisher and Parker 2010)         |
| (pRP1944) |                                                                               |                                   |
| pPHY3685  | <i>PAT1<sub>pro</sub>-GFP-Pat1-SS</i> ( <i>HIS3</i> )                         | This study                        |
| pPHY3691  | <i>PAT1<sub>pro</sub>-GFP-Pat1-AA</i> ( <i>HIS3</i> )                         | This study                        |
| pPHY3693  | <i>PAT1<sub>pro</sub>-GFP-Pat1-EE</i> ( <i>HIS3</i> )                         | This study                        |
| pPHY3702  | <i>ADH2<sub>pro</sub>-H2B-mCherry</i> ( <i>CEN, LEU2</i> )                    | Dr. James Hopper                  |
| pOE79     |                                                                               |                                   |

## Literature Cited

- Buchan, J. R., D. Muhlrud and R. Parker, 2008 P bodies promote stress granule assembly in *Saccharomyces cerevisiae*. *J Cell Biol* 183: 441-455.
- Buchan, J. R., J. H. Yoon and R. Parker, 2011 Stress-specific composition, assembly and kinetics of stress granules in *Saccharomyces cerevisiae*. *J Cell Sci* 124: 228-239.
- Coller, J., and R. Parker, 2005 General translational repression by activators of mRNA decapping. *Cell* 122: 875-886.
- Decker, C. J., D. Teixeira and R. Parker, 2007 Edc3p and a glutamine/asparagine-rich domain of Lsm4p function in processing body assembly in *Saccharomyces cerevisiae*. *J Cell Biol* 179: 437-449.
- Deminoff, S. J., S. C. Howard, A. Hester, S. Warner and P. K. Herman, 2006 Using substrate-binding variants of the cAMP-dependent protein kinase to identify novel targets and a kinase domain important for substrate interactions in *Saccharomyces cerevisiae*. *Genetics* 173: 1909-1917.
- Mazon, M. J., M. M. Behrens, E. Morgado and F. Portillo, 1993 Low activity of the yeast cAMP-dependent protein kinase catalytic subunit Tpk3 is due to the poor expression of the TPK3 gene. *European journal of biochemistry / FEBS* 213: 501-506.
- Pan, X., and J. Heitman, 2002 Protein kinase A operates a molecular switch that governs yeast pseudohyphal differentiation. *Mol Cell Biol* 22: 3981-3993.
- Ramachandran, V., K. H. Shah and P. K. Herman, 2011 The cAMP-dependent protein kinase signaling pathway is a key regulator of P body foci formation. *Mol Cell* 43: 973-981.
- Swisher, K. D., and R. Parker, 2010 Localization to, and effects of Pbp1, Pbp4, Lsm12, Dhh1, and Pab1 on stress granules in *Saccharomyces cerevisiae*. *PLoS One* 5: e10006.
- Teixeira, D., and R. Parker, 2007 Analysis of P-body assembly in *Saccharomyces cerevisiae*. *Mol Biol Cell* 18: 2274-2287.
- Valay, J. G., M. Simon and G. Faye, 1993 The kin28 protein kinase is associated with a cyclin in *Saccharomyces cerevisiae*. *Journal of molecular biology* 234: 307-310.
