# Supplementary material
Source: PubMed Central journal article supplement (PMC3527240)
Supplement: 3232b14bb32603a7461a8c85c103f0fd_genetics.112.146993-6.pdf [file 3232b14bb32603a7461a8c85c103f0fd_genetics.112.146993-6.pdf]

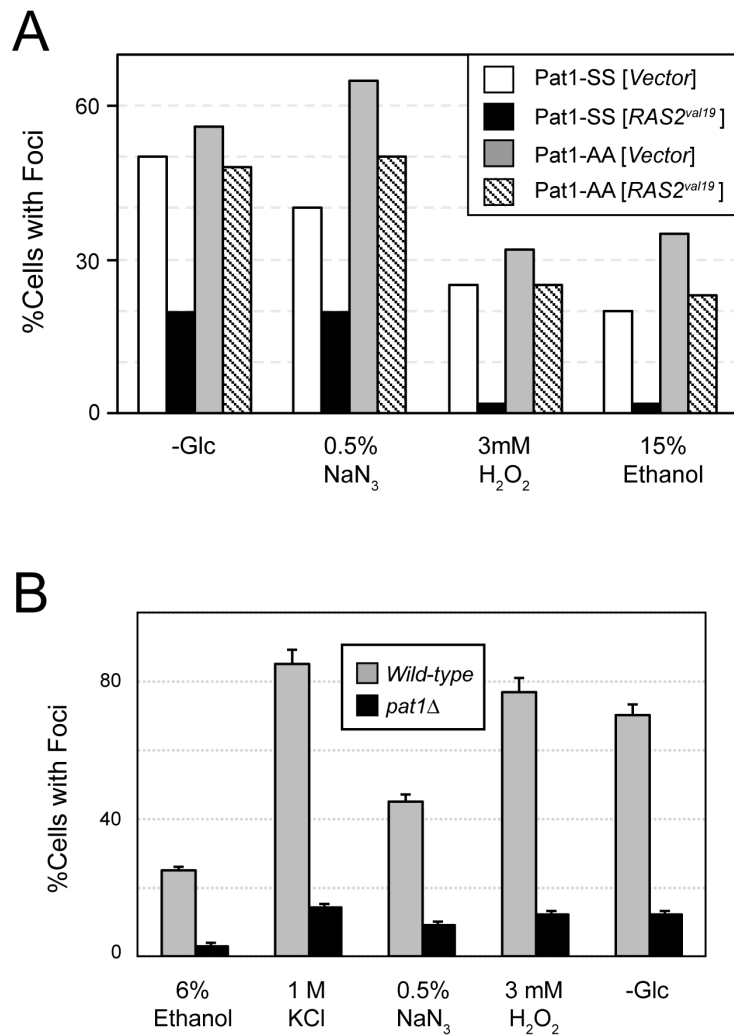

**Figure S2** Quantifying the effects of *RAS2<sup>val19</sup>* and the loss of Pat1 on P body foci formation in response to different stimuli. (A) Quantitation of the microscopy data shown in Figure 4C. The presence of the Pat1-AA variant suppresses the inhibitory effect that *RAS2<sup>val19</sup>* has on P body foci formation. P body foci were indicated by GFP-tagged versions of either Pat1-SS or Pat1-AA, as indicated. (B) Quantitation of the microscopy data shown in Figure 4D. The fraction of cells containing an Edc3-mCh focus was assessed in wild-type and *pat1Δ* cells after a 10 min exposure to the indicated stress condition.
