# Supplementary material
Source: PubMed Central journal article supplement (PMC3527240)
Supplement: aea2a696a03c1f7d6578aa621f20ee14_genetics.112.146993-5.pdf [file aea2a696a03c1f7d6578aa621f20ee14_genetics.112.146993-5.pdf]

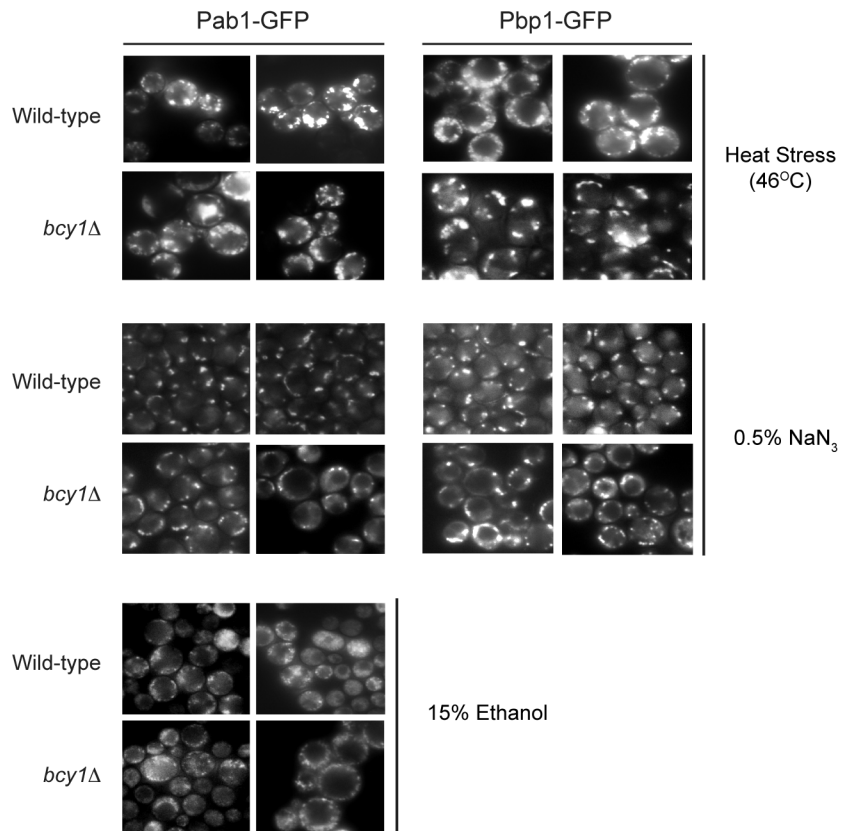

**Figure S3** Stress granule foci form in normal numbers in *bcy1Δ* mutant cells. Wild-type or *bcy1Δ* cells expressing either a Pab1- or Pbp1-GFP reporter were examined by fluorescence microscopy after a 30 min exposure to the indicated stress condition.
