# Supplementary material
Source: PubMed Central journal article supplement (PMC3527240)
Supplement: c562d9500d7f588fd0546e94e7a64629_genetics.112.146993-10.pdf [file c562d9500d7f588fd0546e94e7a64629_genetics.112.146993-10.pdf]

**Table S1 Yeast strains used in this study**

|                        |                                                                                                                        |                             |
|------------------------|------------------------------------------------------------------------------------------------------------------------|-----------------------------|
| PHY1736<br>(GF260-2)   | <i>MATa leu2 trp1 ura3 lys2</i>                                                                                        | (Valay <i>et al.</i> 1993)) |
| PHY 1954               | <i>MATa leu2 trp1 ura3 lys2 ras2::URA3</i>                                                                             | This study                  |
| PHY3193<br>(XPY310a)   | <i>MATa/α pep4::HIS3/pep4::HIS3 prb1_1.6R/prb1_1.6R can1/can1 ura3-52/ura3-52 his3_200/his3_200 GAL1-GST-TPK1/TPK1</i> | (Pan and Heitman 2002)      |
| PHY3194<br>(XPY311a)   | <i>MATa/α pep4::HIS3/pep4::HIS3 prb1_1.6R/prb1_1.6R can1/can1 ura3-52/ura3-52 his3_200/his3_200 GAL1-GST-TPK2/TPK2</i> | (Pan and Heitman 2002))     |
| PHY3362<br>(W303-1A)   | <i>MATa ade2-1 can1-100 ura3-1 leu2-3,112 his3-11,15 trp1-1 TPK1 TPK2 TPK3</i>                                         | (Mazon <i>et al.</i> 1993)  |
| PHY3364<br>(MB23)      | <i>PHY3362 TPK1 tpk2: :HIS3 tpk3: :URA3</i>                                                                            | (Mazon <i>et al.</i> 1993)  |
| PHY3367<br>(MB13)      | <i>PHY3362 tpk1: :LEU2 TPK2 tpk3: :URA3</i>                                                                            | (Mazon <i>et al.</i> 1993)  |
| PHY3369<br>(MB12)      | <i>PHY 3362 tpk1: :LEU2 tpk2: :HIS3 TPK3</i>                                                                           | (Mazon <i>et al.</i> 1993)  |
| PHY4231<br>(BY4741)    | <i>MATa hisΔ1 leu2Δ0 met15Δ0 ura3Δ0</i>                                                                                | Open Biosystems             |
| PHY 4311               | <i>MATα his3 leu2 ura3</i>                                                                                             | (Coller and Parker 2005)    |
| PHY4313<br>(yRP2067)   | <i>MATα his3 leu2 ura3 pat1Δ::NEO</i>                                                                                  | (Coller and Parker 2005)    |
| PHY4697<br>(Y3175)     | <i>MATa ade2-1 can1-100 his3-11,15 leu2-3,112 trp1-1 ura3-1 tpk2::KAN tpk3::TRP1 tpk1(M164G)</i>                       | Dr. James Broach            |
| PHY4773                | <i>MATa his3Δ1 leu2Δ0 met15Δ0 ura3Δ0 DCP2-GFP</i>                                                                      | Invitrogen                  |
| PHY4774                | <i>MATa his3Δ1 leu2Δ0 met15Δ0 ura3Δ0 XRN1-GFP</i>                                                                      | Invitrogen                  |
| PHY4827<br>(yRP2162)   | <i>MATa his4-539 leu2-3,112 trp1 ura3-52 cup1::LEU2/PGK1pG/MFA2pG Dcp2-GFP(NEO)</i>                                    | (Decker <i>et al.</i> 2007) |
| PHY 4833<br>(yRP 2183) | <i>MATa leu2-3,112 trp1 ura3-52 his4-539 lys2-201 cup1::LEU2/PGK1pG/MFA2pG pat1::LEU2 DCP2-GFP (NEO)</i>               | (Teixeira and Parker 2007)  |
| PHY 4834<br>(yRP1724)  | <i>MATa2 his4-539 leu2-3,112 trp1 ura3-5 cup1::LEU2/PGK1pG/MFA2pG DHH1-GFP (NEO)</i>                                   | (Decker <i>et al.</i> 2007) |
| PHY 4898               | <i>MATa leu2 trp1 ura3 lys2 ras2::URA3 pat1::KAN</i>                                                                   | This study                  |

|          |                                                      |                 |
|----------|------------------------------------------------------|-----------------|
| PHY 4899 | <i>MATa his3Δ1 leu2Δ0 met15Δ0 ura3Δ0 PAB1-GFP</i>    | Invitrogen      |
| PHY 4900 | <i>MATa his3Δ1 leu2Δ0 met15Δ0 ura3Δ0 PBP1-GFP</i>    | Invitrogen      |
| PHY 4927 | <i>MATα his3 leu2 ura3 pat1Δ:: NEO GFP-[PAT1-SS]</i> | This study      |
| PHY 4928 | <i>MATα his3 leu2 ura3 pat1Δ:: NEO GFP-[PAT1-AA]</i> | This study      |
| PHY 4929 | <i>MATα his3 leu2 ura3 pat1Δ:: NEO GFP-[PAT1-EE]</i> | This study      |
| PHY 4939 | <i>MATa his3Δ1 leu2Δ0 met15Δ0 ura3Δ0 PBP4-GFP</i>    | Invitrogen      |
| PHY 4940 | <i>MATa his3Δ1 leu2Δ0 met15Δ0 ura3Δ0 PUB1-GFP</i>    | Invitrogen      |
| PHY 4941 | <i>MATa his3Δ1 leu2Δ0 met15Δ0 ura3Δ0 LSM12-GFP</i>   | Invitrogen      |
| PHY 4942 | <i>MATa his3Δ1 leu2Δ0 met15Δ0 ura3Δ0 PAT1-GFP</i>    | Invitrogen      |
| PHY 4859 | <i>MATa hisΔ1 leu2Δ0 met15Δ0 ura3Δ0 pbp4::KAN</i>    | Open Biosystems |
| PHY 4860 | <i>MATa hisΔ1 leu2Δ0 met15Δ0 ura3Δ0 lsm12::KAN</i>   | Open Biosystems |
| PHY 4869 | <i>MATa hisΔ1 leu2Δ0 met15Δ0 ura3Δ0 pub1::KAN</i>    | Open Biosystems |
| PHY 4870 | <i>MATa hisΔ1 leu2Δ0 met15Δ0 ura3Δ0 pbp1::KAN</i>    | Open Biosystems |

---
