# Supplementary material
Source: PubMed Central journal article supplement (PMC3527240)
Supplement: d0ddbc0ed6bfc32a1f3569f81283dbda_genetics.112.146993-7.pdf [file d0ddbc0ed6bfc32a1f3569f81283dbda_genetics.112.146993-7.pdf]

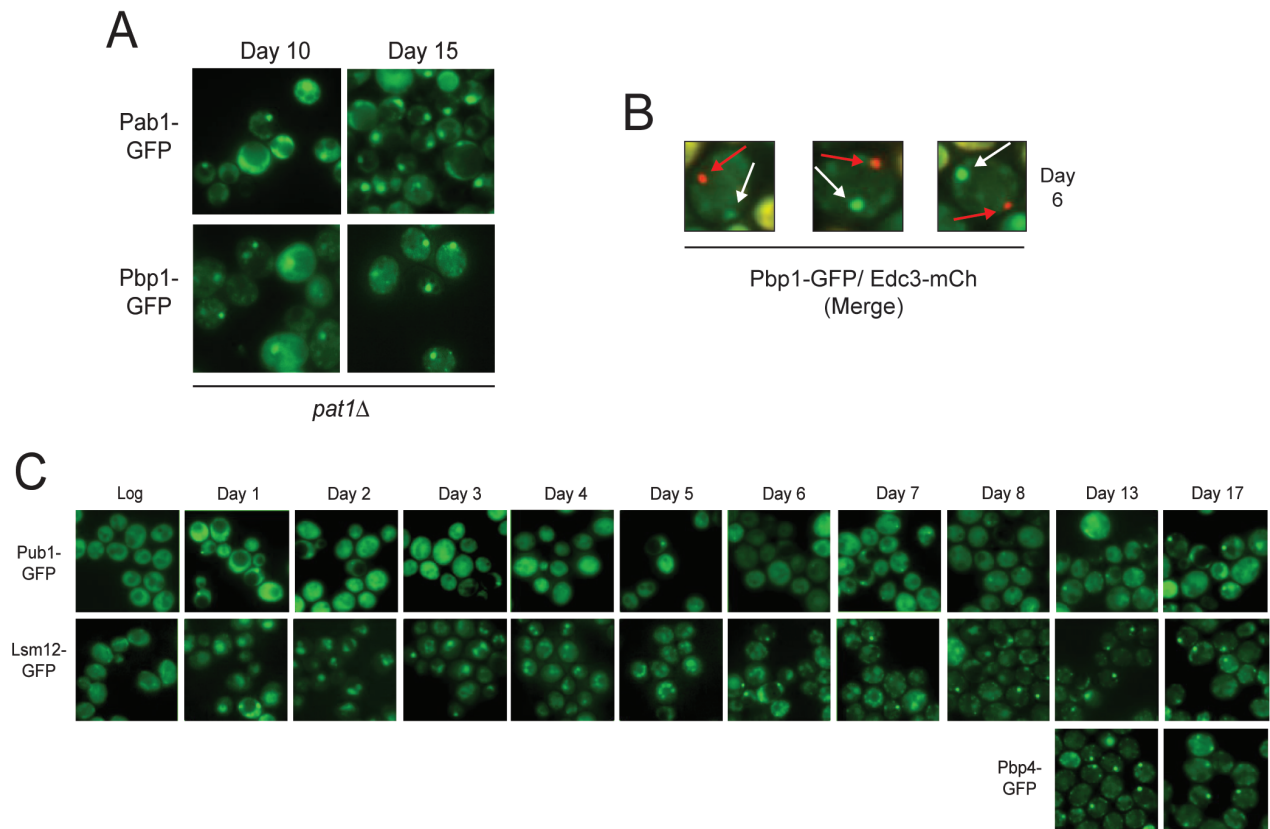

**Figure S6** Stress granule foci were present in stationary phase cells. (A) The number of stress granule foci was not reduced in *pat1Δ* cells. The localization of the Pab1- and Pbp1-GFP reporters in wild-type and *pat1Δ* cells was assessed by fluorescence microscopy at the indicated times of growth. (B) P body and stress granule reporters did not co-localize in cells after 6 days of growth in an SC-glucose medium. Representative images of three cells containing both Pbp1-GFP (indicated by the white arrows) and Edc3-mCh (red arrows) foci are shown. Quantitation of the data are indicated in the text. (C) The localization of the indicated GFP-tagged stress granule reporters was assessed by fluorescence microscopy at the indicated days of growth.
